# Supplementary material
Source: PubMed Central journal article supplement (PMC4727416)

**Supplemental data:**

**<sup>1</sup>H-NMR spectrum of GlcCer 1**

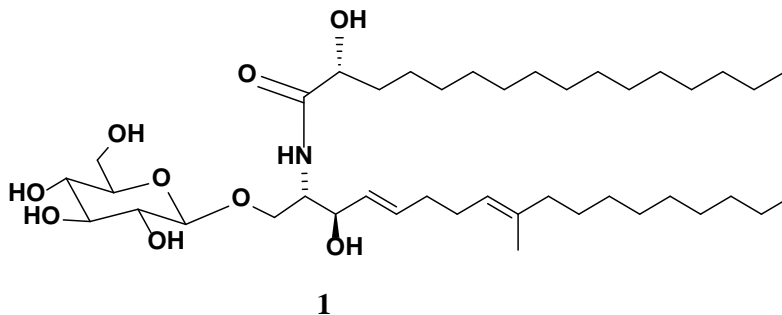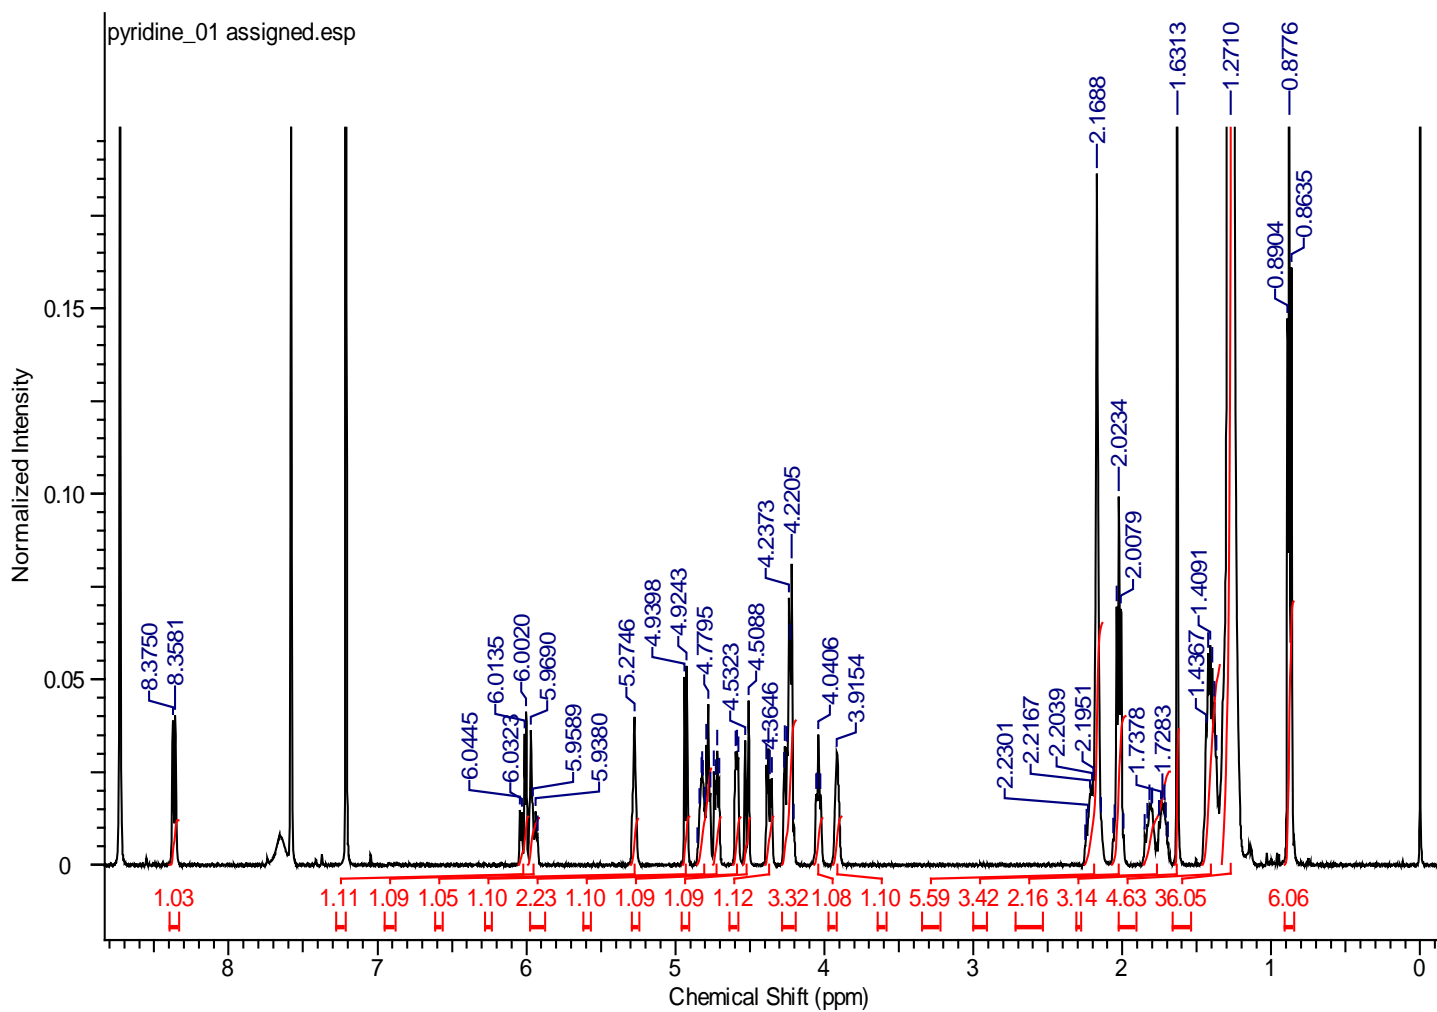

## $^1\text{H}$ - $^1\text{H}$ COSY spectrum of GlcCer 1

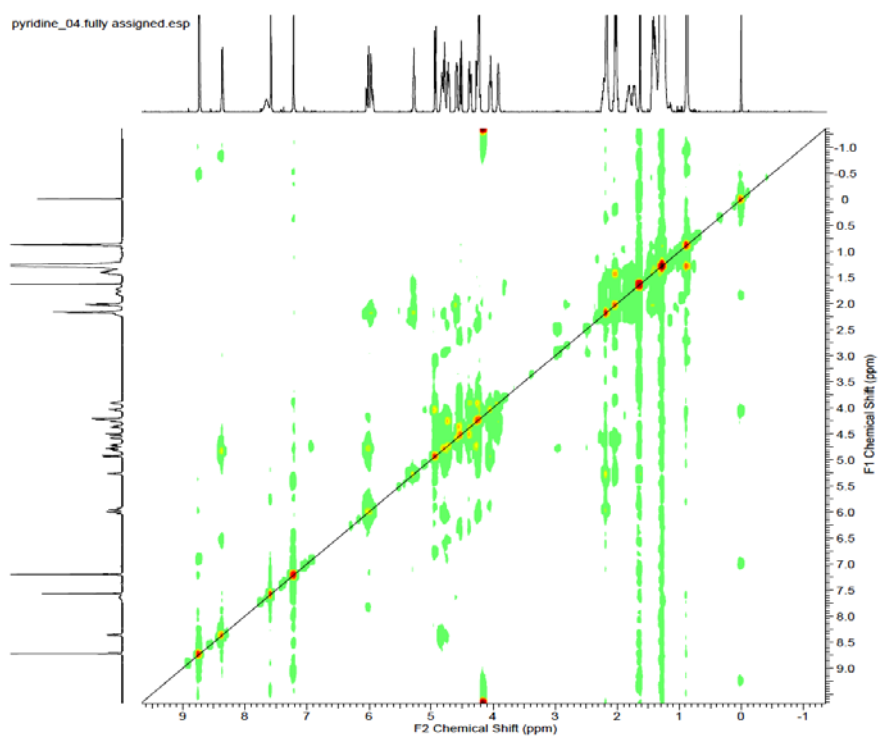

## $^{13}\text{C}$ - spectrum of GlcCer 1

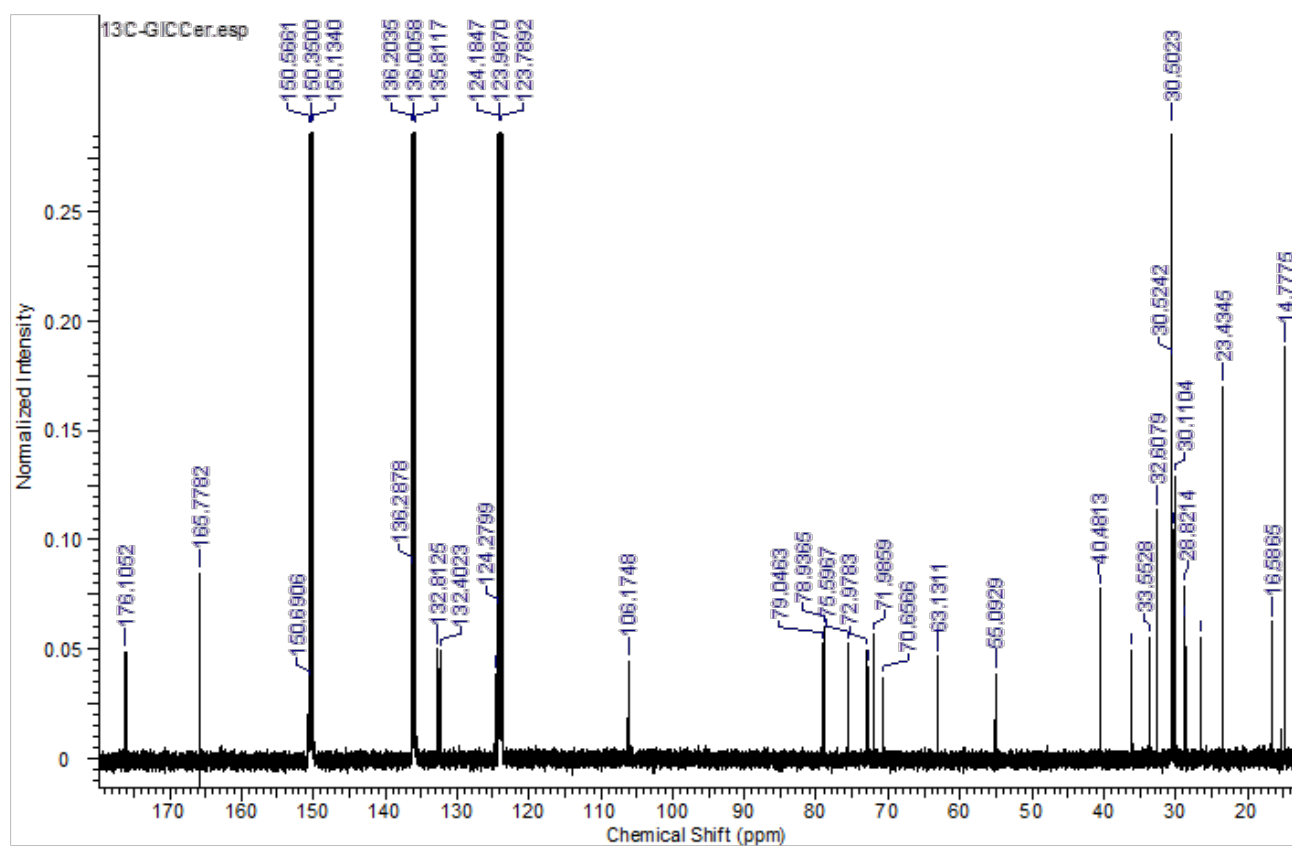

### HMQC spectrum of GlcCer 1

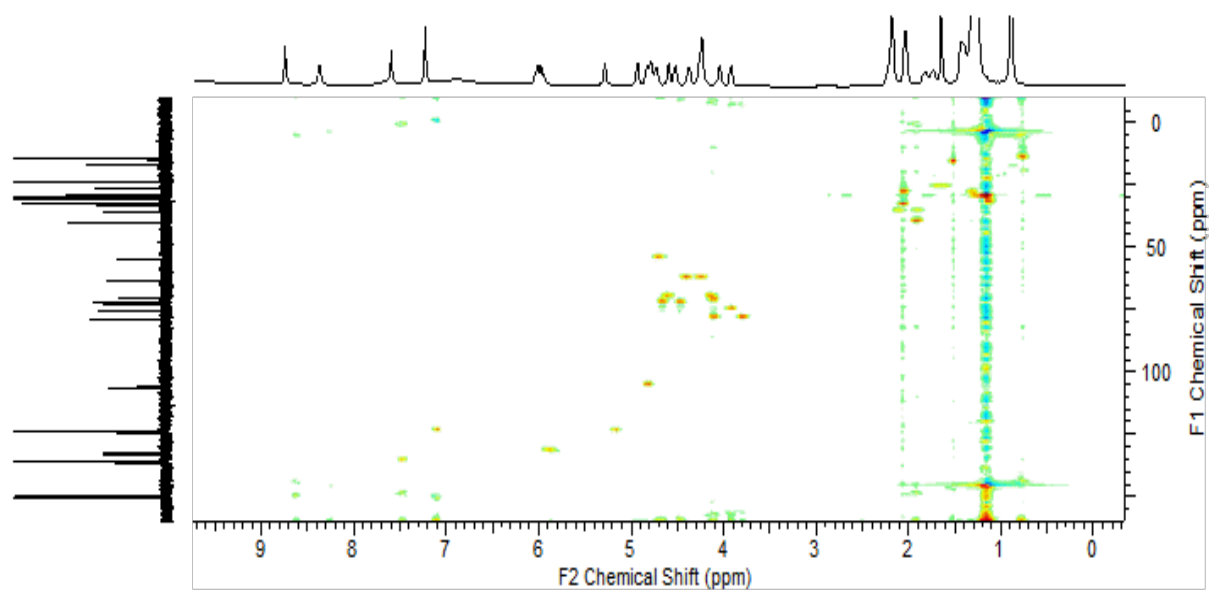

### HMBC spectrum of GlcCer 1

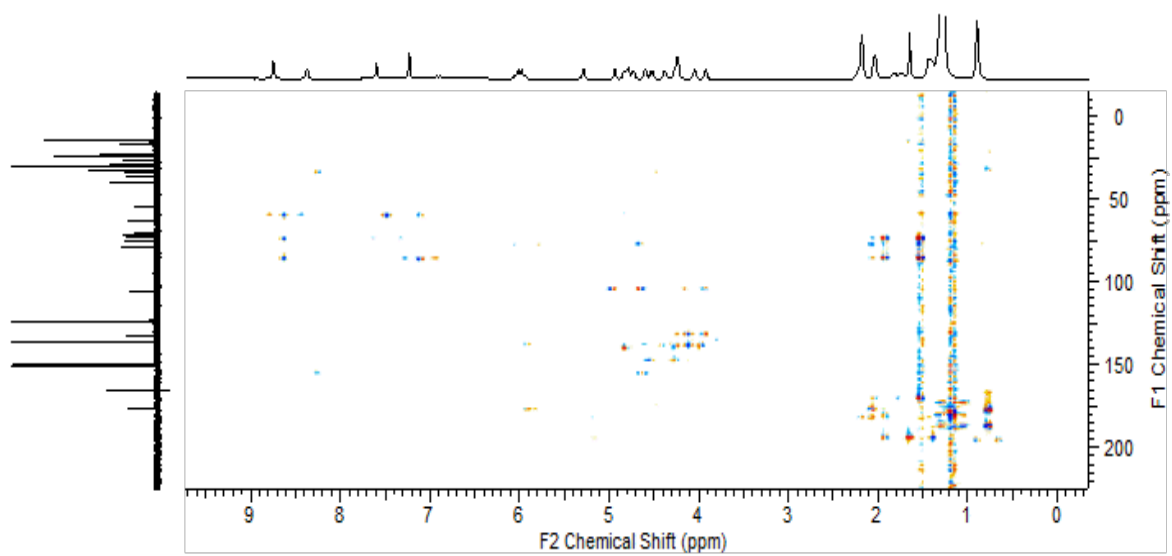

# ESI-mass spectrum of GlcCer 1

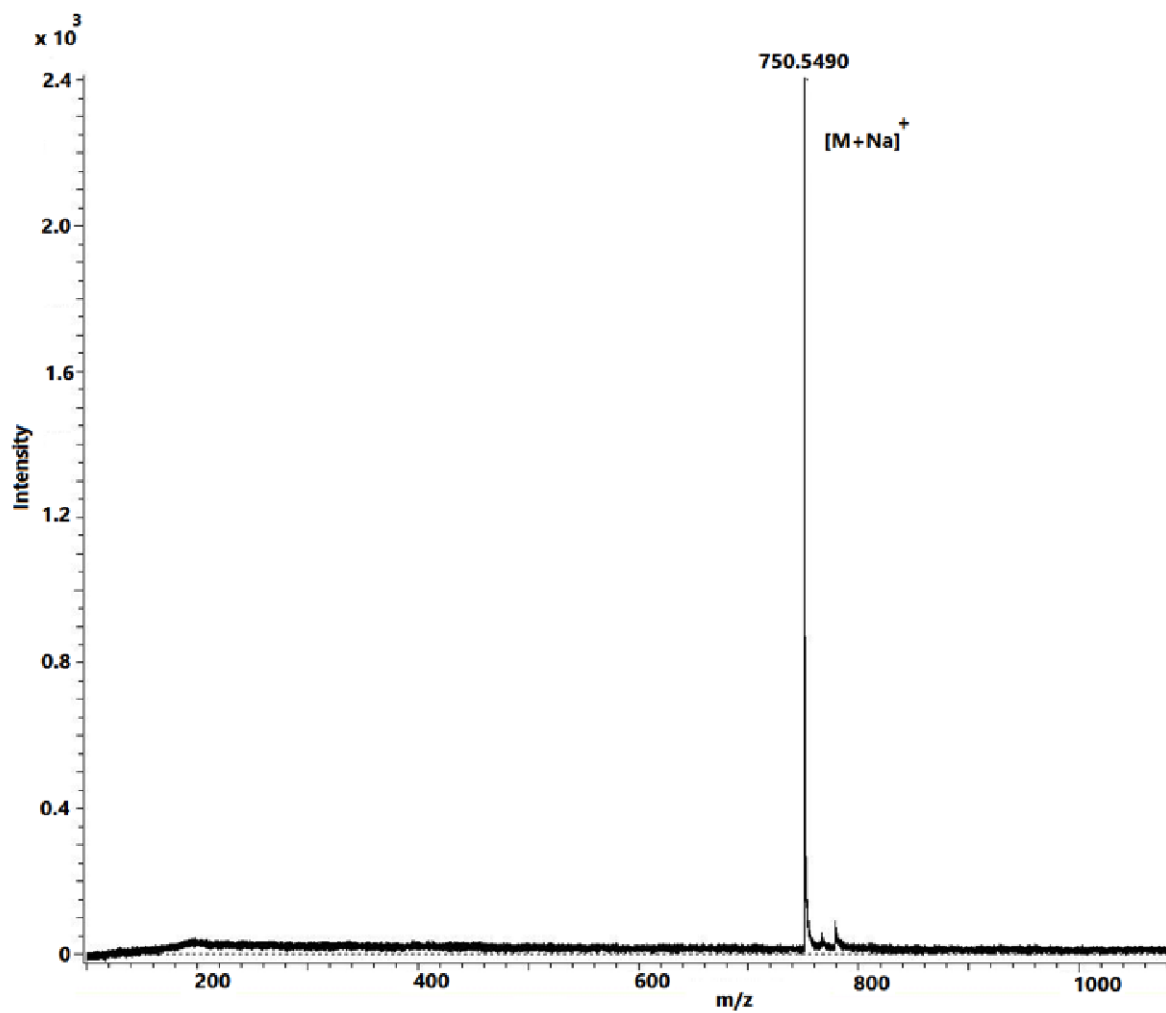

### <sup>1</sup>H-NMR spectrum of 2

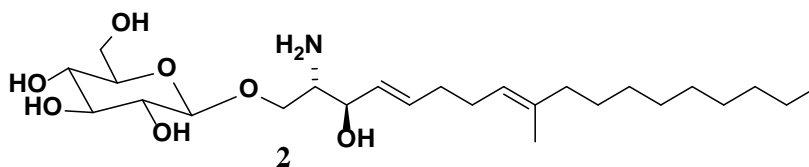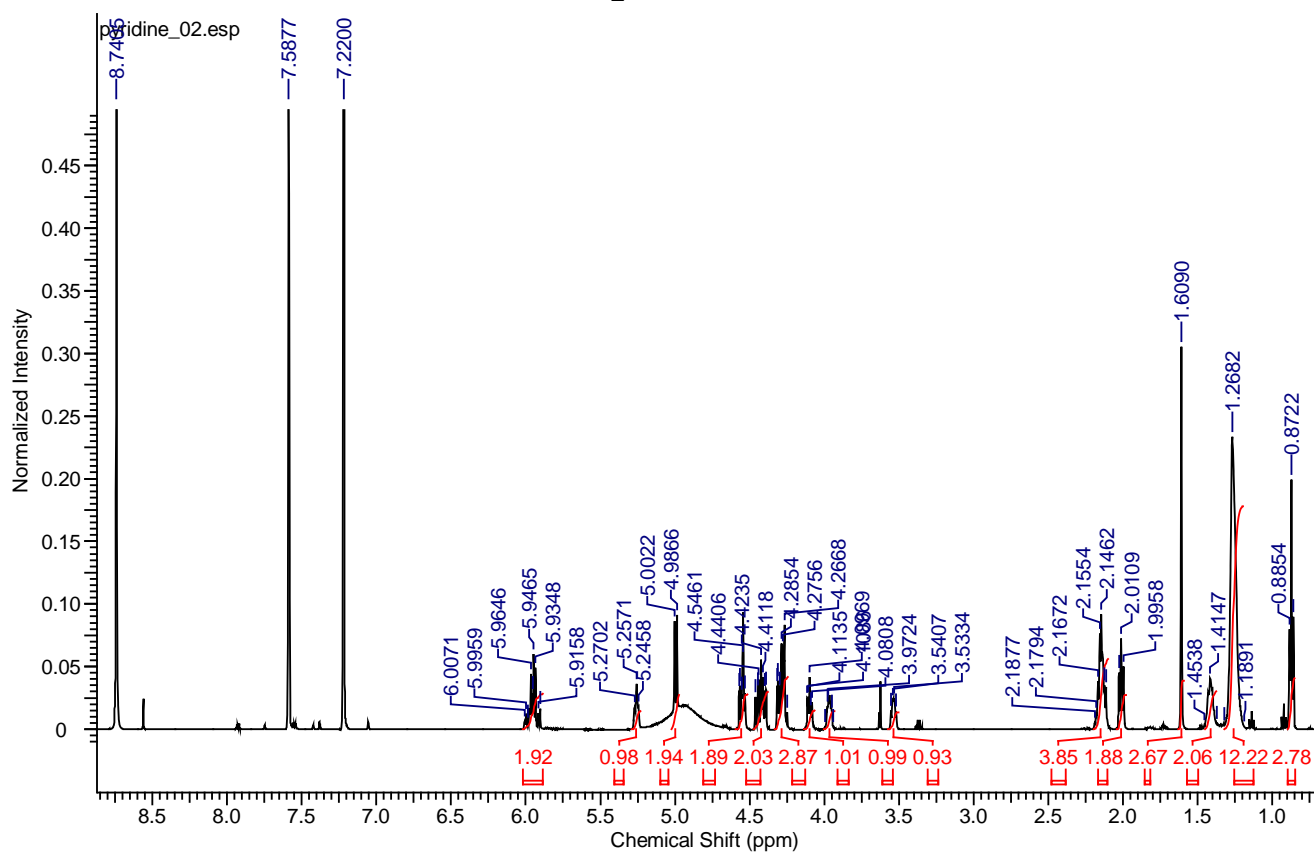

### ESI-mass spectrum of 2

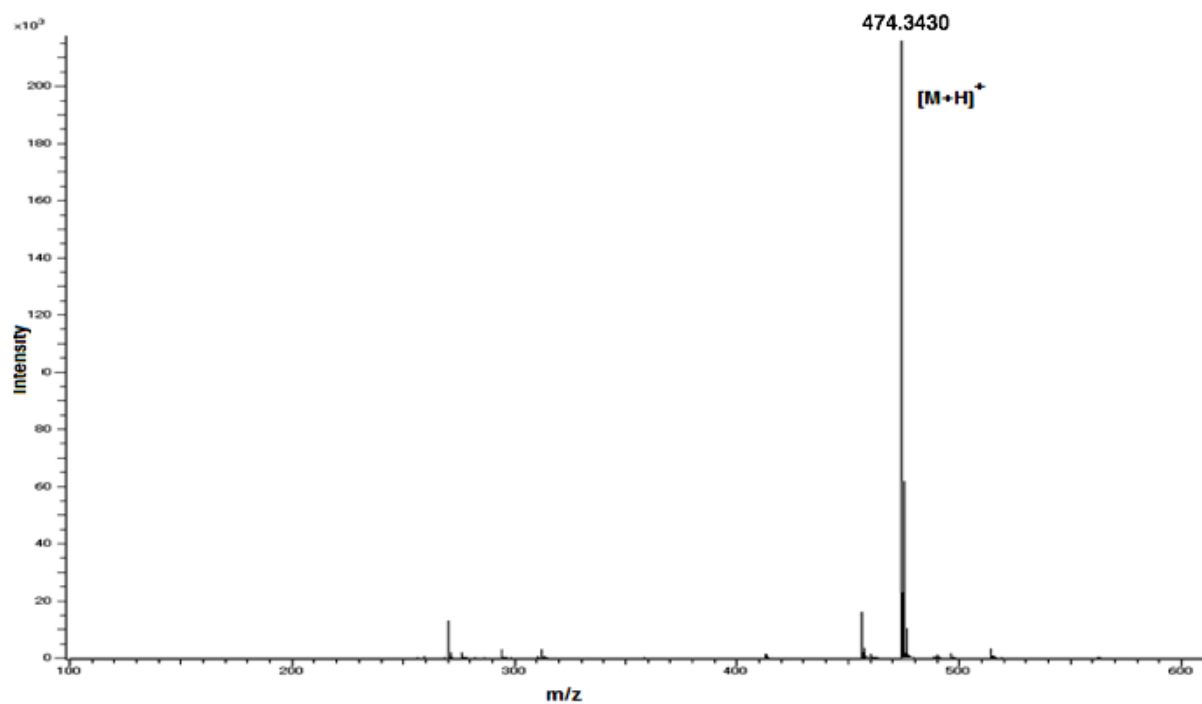

<sup>1</sup>H-NMR spectrum of 3

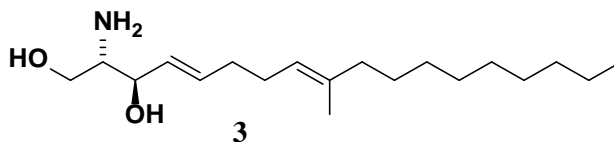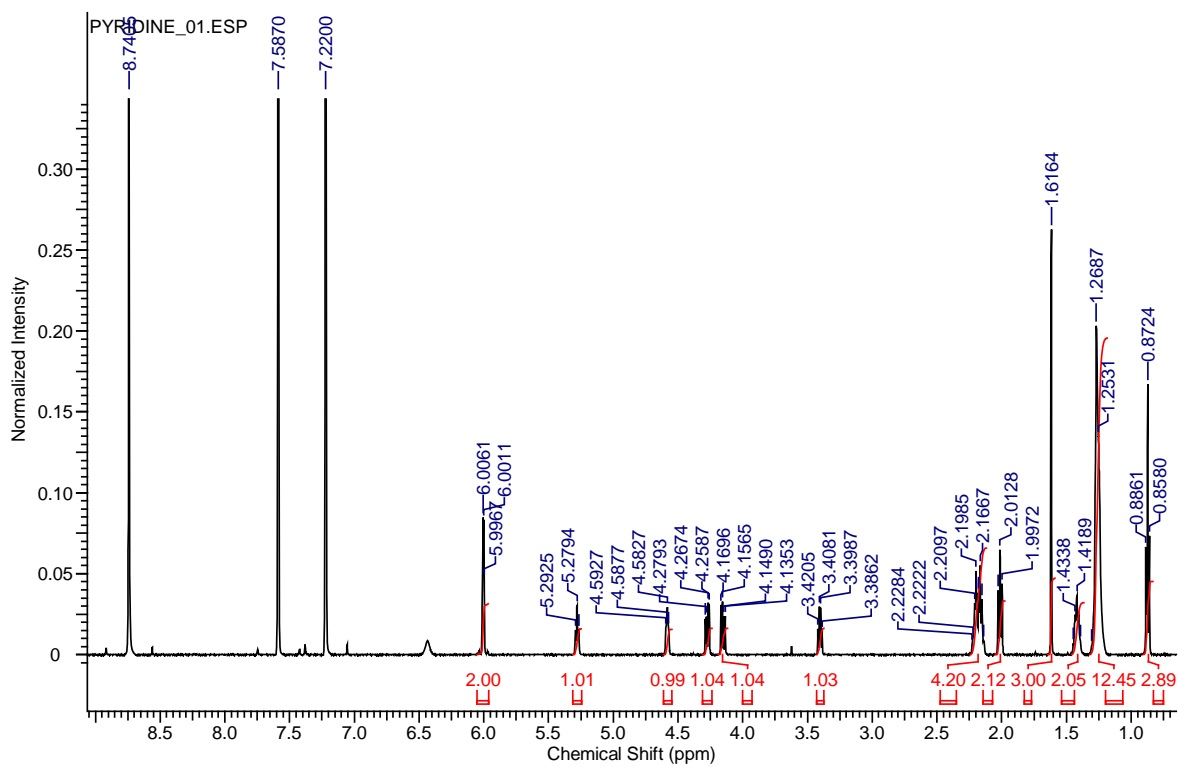

<sup>1</sup>H-<sup>1</sup>H COSY spectrum of 3

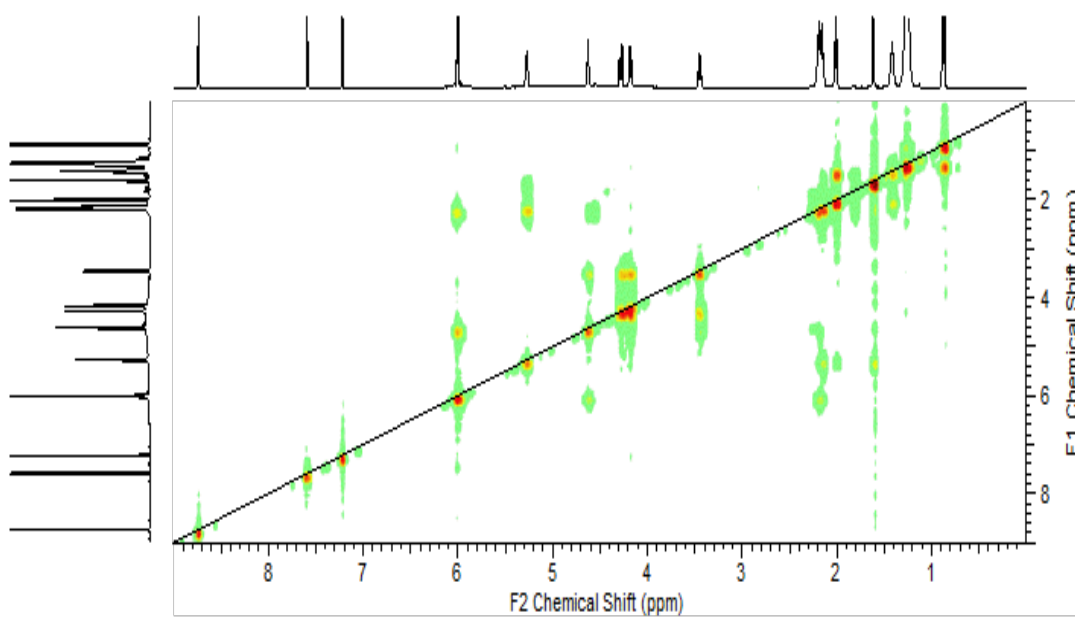

### <sup>13</sup>C- spectrum of 3

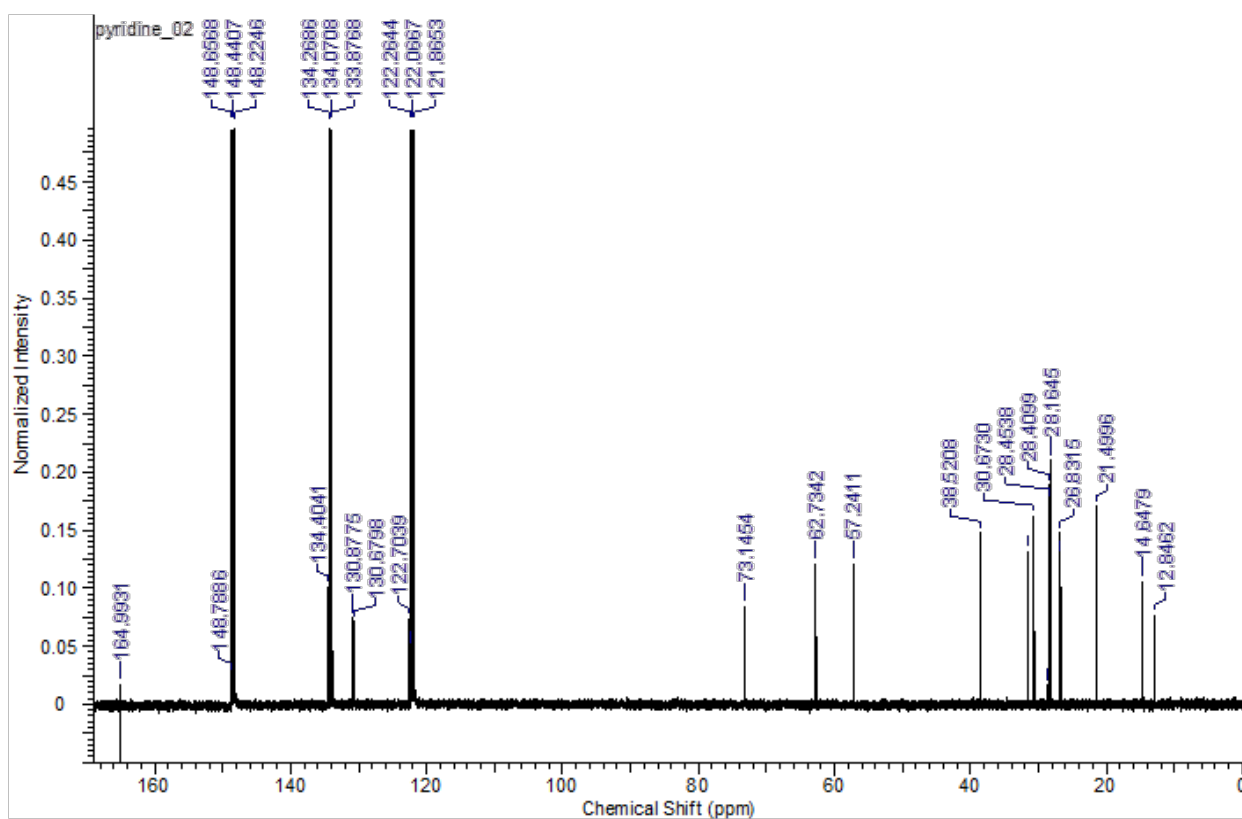

### HMQC spectrum of 3

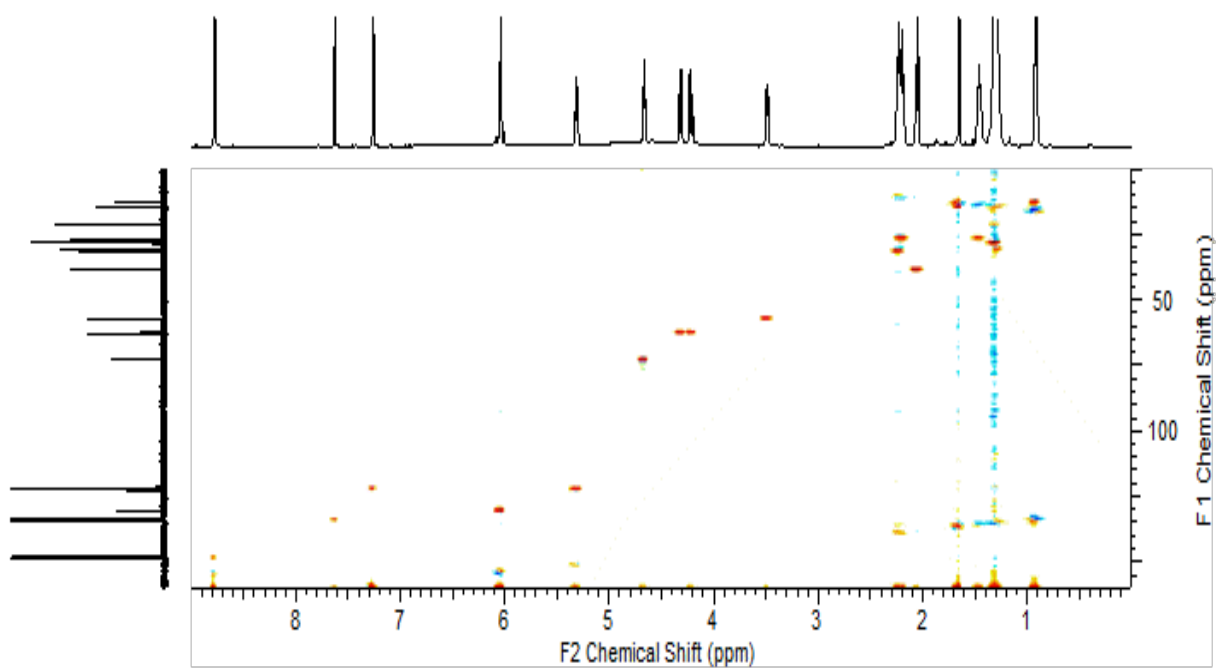

### HMBC spectrum of 3

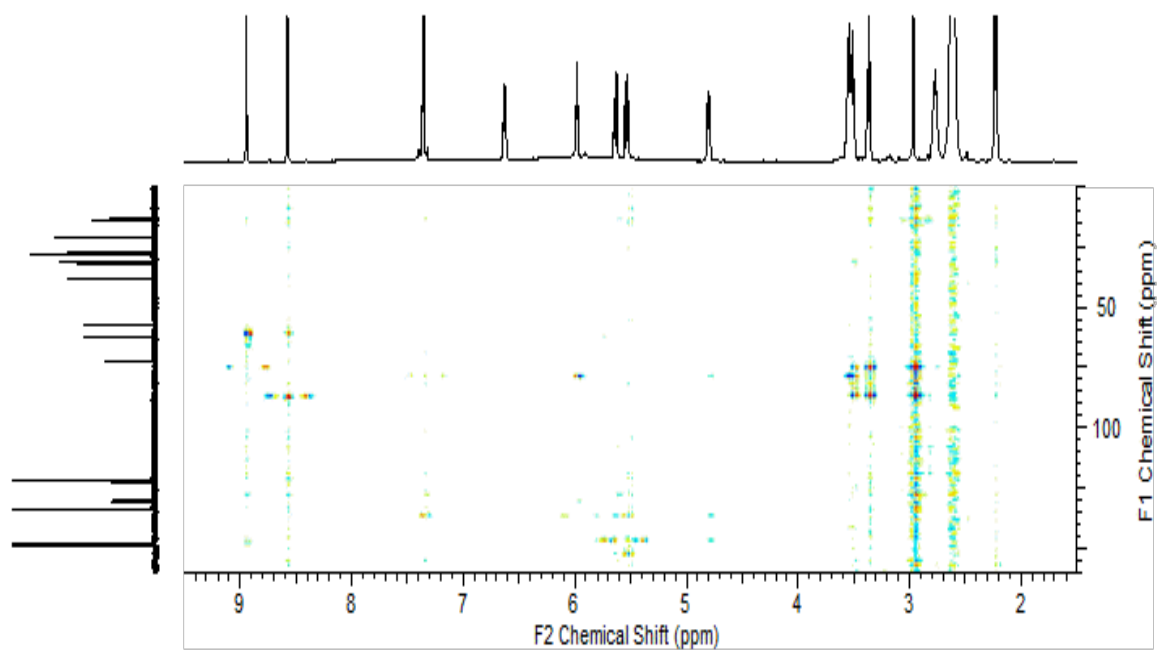

### ESI-mass spectrum of 3

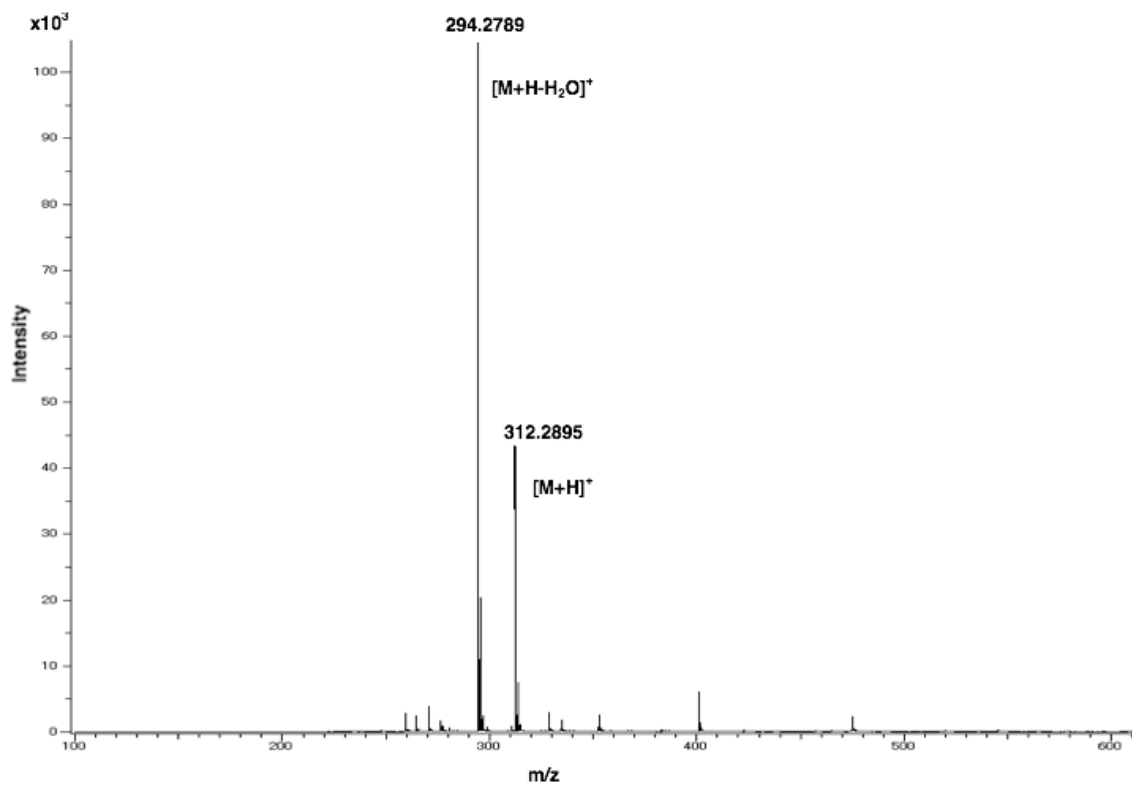



### ESI-mass spectrum of rice lyso-GlcCers

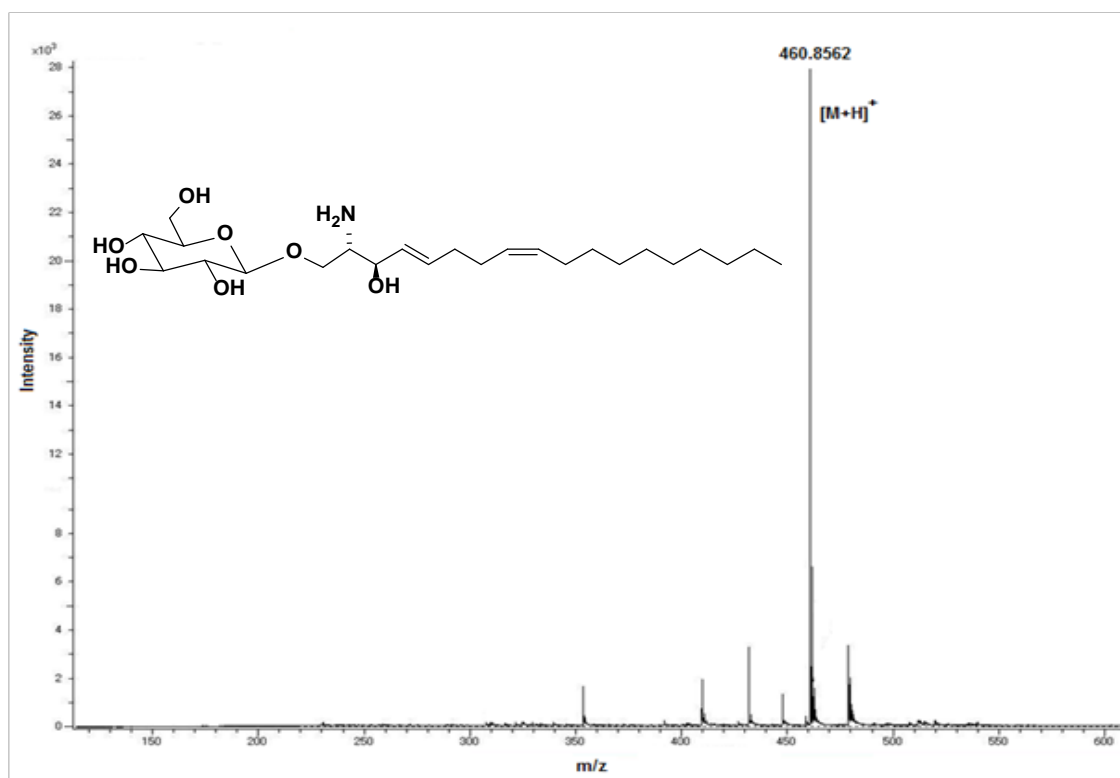

### ESI-mass spectrum of rice sphingoid bases

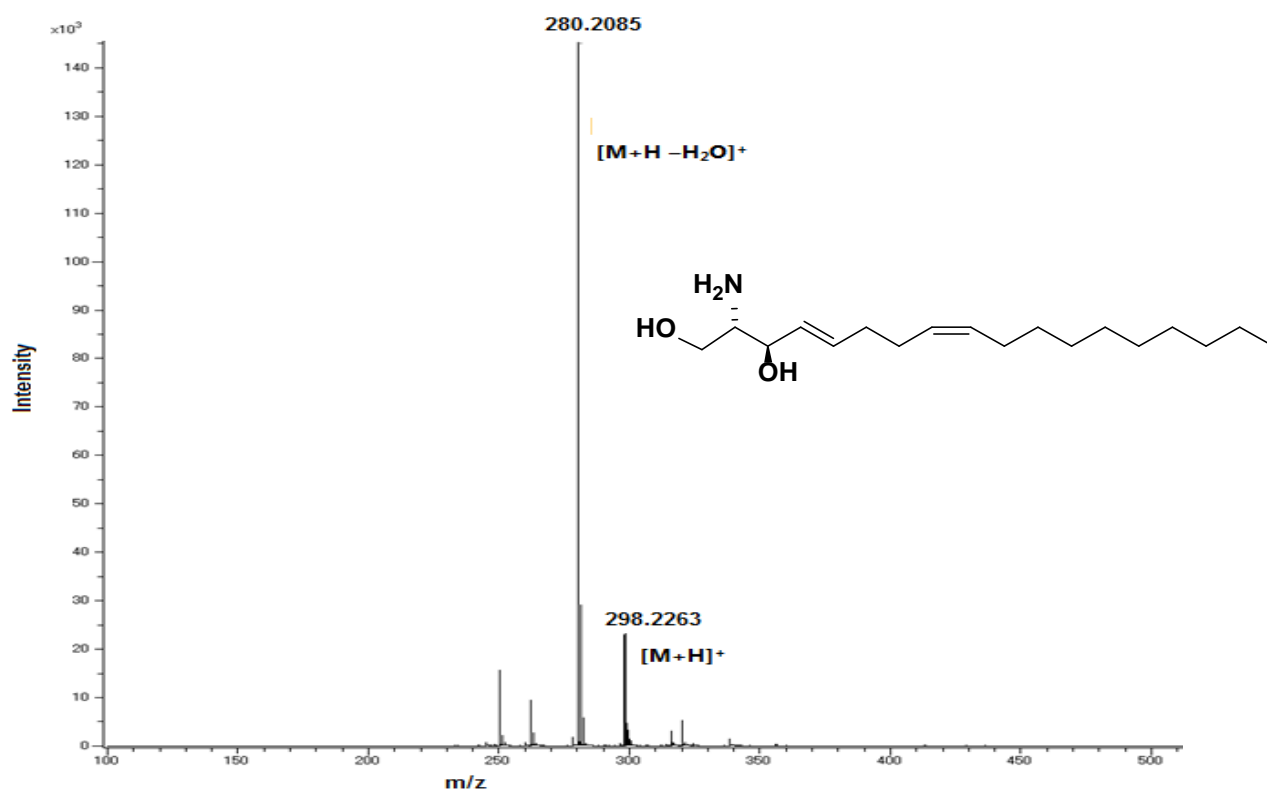

### ESI-Mass spectrum of wheat lyso-GlcCers

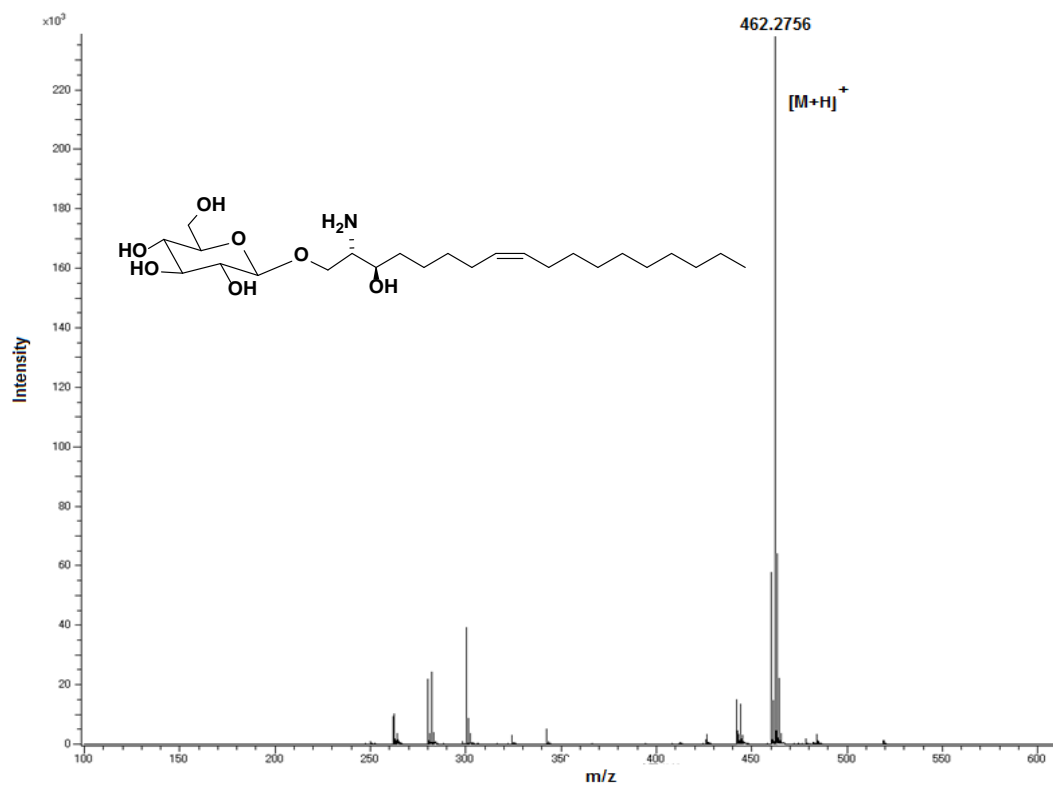

### ESI-mass spectrum of wheat spingoid bases

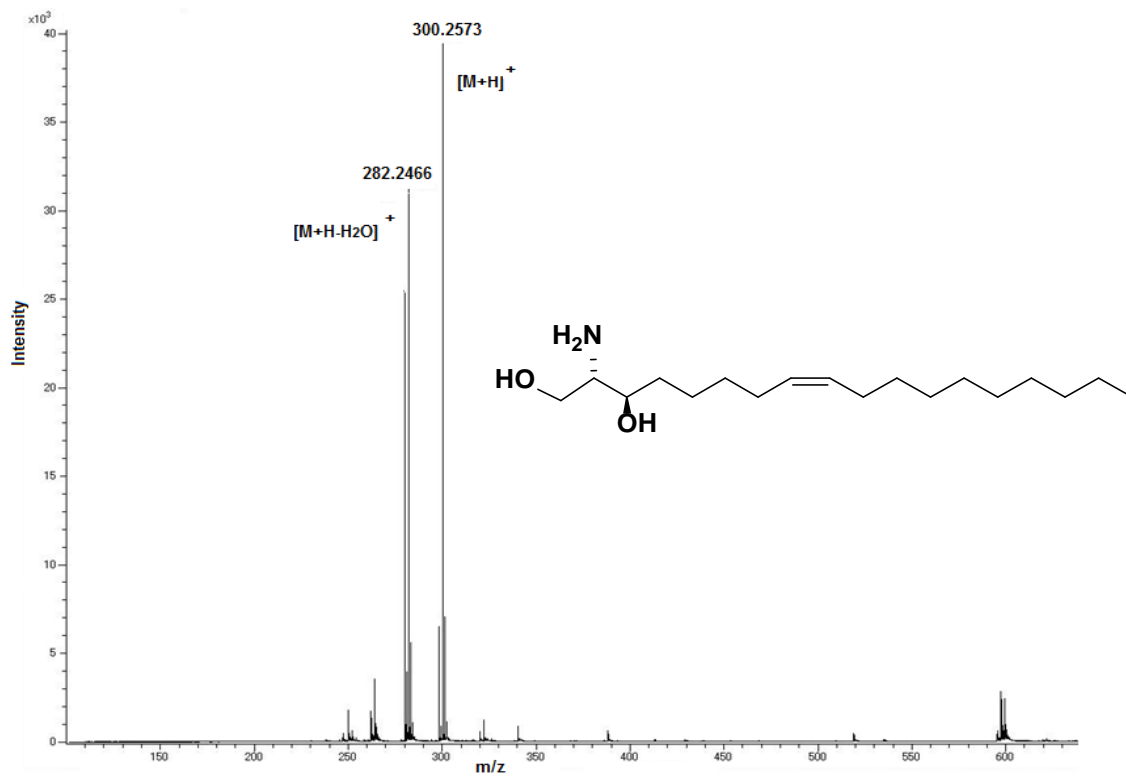

### ESI-mass spectrum of soy lyso-GlcCer

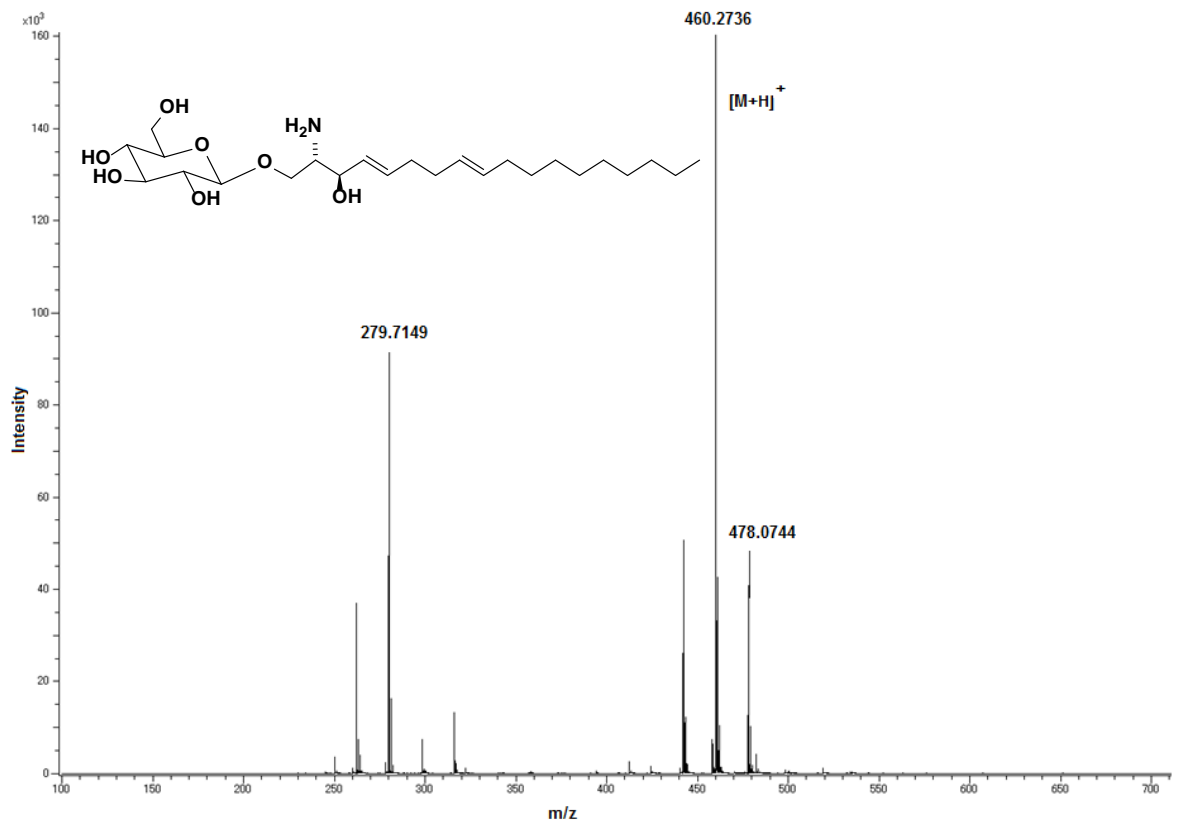

### ESI-mass spectrum of soy spingoid bases

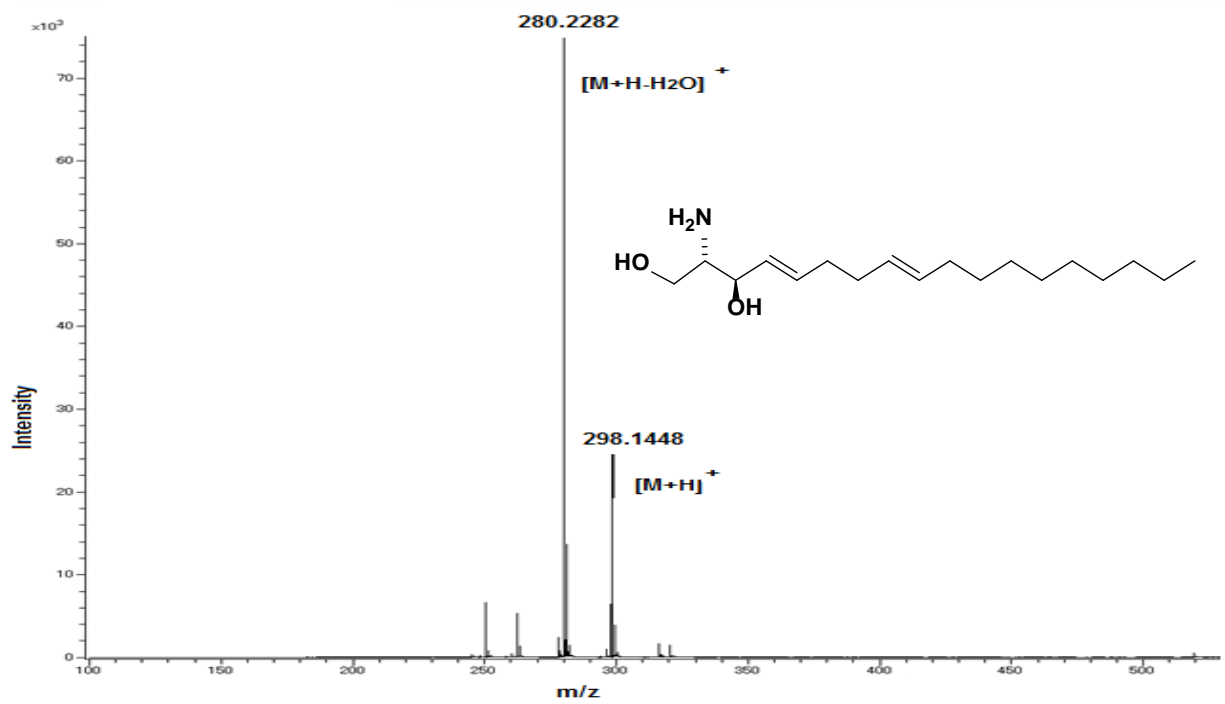

Supplement: 10.1194_D065268_jlr.D065268-1.pdf [file 10.1194_D065268_jlr.D065268-1.pdf]
